# Supplementary material for: Hydrogeological properties of fault zones in a karstified carbonate aquifer (Northern Calcareous Alps, Austria)
Source: Springer Nature journal article supplement (doi:10.1007/s10040-016-1388-9), 2016-03-11
Supplement: MOESM1 [file 11679344]

**Hydrogeological properties of fault zones in a karstified carbonate aquifer (Northern Calcareous Alps, Austria)**

**Hydrogeology Journal – Electronic Supplementary Material**

H. Bauer<sup>1\*</sup>, T. C. Schröckenfuchs<sup>1</sup> and K. Decker<sup>1</sup>

<sup>1</sup>Department of Geodynamics and Sedimentology, University of Vienna, Althanstraße 14, 1090 Vienna, Austria

\* corresponding author: [helene.bauer@univie.ac.at](mailto:helene.bauer@univie.ac.at)

**Fig S1** Overview of  $P_{32}$  values measured from the faults. These data are used for the fault zone profiles presented in section '*Lithological and hydrogeological characterization of carbonate protolith, fractured rock and fault rock*' of the main article. Individual fracture sets with their average orientation and spacing are listed and are the basis for  $P_{32}$  calculation and the classification of fracture classes (Frac Class).

**Fig S1**

|                             | Distance MF (m)             | Set Nr.                     | Average Orientation | Spacing (cm) | $P_{32}$ (m <sup>2</sup> /m <sup>3</sup> ) | Frac Class |             | Distance MF (m) | Set Nr. | Average Orientation | Spacing (cm)                | $P_{32}$ (m <sup>2</sup> /m <sup>3</sup> ) | Frac Class |       |      |        |       |      |      |      |        |
|-----------------------------|-----------------------------|-----------------------------|---------------------|--------------|--------------------------------------------|------------|-------------|-----------------|---------|---------------------|-----------------------------|--------------------------------------------|------------|-------|------|--------|-------|------|------|------|--------|
| <b>Fault A1 (Dolostone)</b> | 4m NW                       | 1                           | 310/76 //MF         | 23           | 4,3                                        | 25,6       | FC 2        | 5m S            | 1       | 330/80 //MF, R      | 33                          | 3,0                                        | 12,0       | FC 2  |      |        |       |      |      |      |        |
|                             |                             | 2                           | 288/64              | 16           | 6,3                                        |            |             |                 | 2       | 082/70// R'         | 27                          | 3,7                                        |            |       |      |        |       |      |      |      |        |
|                             |                             | 3                           | 217/54              | 12           | 8,3                                        |            |             |                 | 3       | 045/40              | 19                          | 5,3                                        |            |       |      |        |       |      |      |      |        |
|                             |                             | 4                           | 051/62              | 15           | 6,7                                        |            |             |                 | 4       | 048/17              | 52                          | 1,9                                        |            |       |      |        |       |      |      |      |        |
|                             | 2m NW                       | 1                           | 320/80 // MF        | 5            | 20,0                                       | 71,1       | FC 3        |                 | 1m S    | 1                   | 326/84 //MF,R               | 25                                         |            |       | 4    | 15,0   | FC 2  |      |      |      |        |
|                             |                             | 2                           | 290/70              | 8            | 12,5                                       |            |             |                 |         | 2                   | 082/70// R'                 | 30                                         |            |       | 3,3  |        |       |      |      |      |        |
|                             |                             | 3                           | 020/68              | 10           | 10,0                                       |            |             |                 |         | 3                   | 045/40                      | 20                                         |            |       | 5    |        |       |      |      |      |        |
|                             |                             | 4                           | 220/60              | 7            | 14,3                                       |            |             |                 |         | 4                   | 048/17                      | 38                                         |            |       | 2,63 |        |       |      |      |      |        |
|                             | 0,2m NW                     | 1                           | 040/65              | 7            | 14,3                                       | 203,3      | FC 4        | 1m N            | 1       | 331/80 //MF,R       | 5                           | 20                                         | 39,5       | FC 2  |      |        |       |      |      |      |        |
|                             |                             | 2                           | 287/15              | 2            | 50,0                                       |            |             |                 | 2       | 081/70// R'         | 15                          | 6,7                                        |            |       |      |        |       |      |      |      |        |
|                             |                             | 3                           | 290/70              | 3            | 33,3                                       |            |             |                 | 3       | 042/43              | 35                          | 2,9                                        |            |       |      |        |       |      |      |      |        |
|                             |                             | 4                           | 020/68              | 4            | 25,0                                       |            |             |                 | 4       | 050/10              | 10                          | 10,0                                       |            |       |      |        |       |      |      |      |        |
|                             |                             | 5                           | 222/58              | 4            | 25,0                                       |            |             |                 | 1       | 328/75//MF,R        | 31                          | 3,2                                        |            |       |      |        |       |      |      |      |        |
|                             |                             | 6                           | 038/ 62             | 5            | 20,0                                       |            |             |                 | 2       | 075/72              | 42                          | 2,4                                        |            |       |      |        |       |      |      |      |        |
|                             | <b>Fault A2 (Dolostone)</b> | Limestone                   | 1                   | 190/78       | 10                                         | 10,0       | 28,8        | FC 2            | 20m N   | 1                   | 334/88 //MF,R               | 30                                         | 3,3        | 11,7  | FC 2 |        |       |      |      |      |        |
|                             |                             |                             | 2                   | 315/74 // MF | 13                                         | 7,7        |             |                 |         | 2                   | 068/60                      | 16                                         | 6,3        |       |      |        |       |      |      |      |        |
|                             |                             |                             | 3                   | 095/62       | 9                                          | 11,1       |             |                 |         | 3                   | 046/45                      | 15                                         | 6,7        |       |      |        |       |      |      |      |        |
|                             |                             | Dolostone                   | 1                   | 188/ 78      | 3                                          | 33,3       | 131,9       | FC 3            |         | 17m S               | 1                           | 352/80                                     | 15         |       |      | 6,7    | 34,3  | FC 2 |      |      |        |
| 2                           |                             |                             | 320/81              | 2            | 50,0                                       | 2          |             |                 |         |                     | 077/82                      | 30                                         | 3,3        |       |      |        |       |      |      |      |        |
| 3                           |                             |                             | 100/59              | 7            | 14,3                                       | 3          |             |                 |         |                     | 046/45                      | 10                                         | 10,0       |       |      |        |       |      |      |      |        |
| FC 3                        |                             | 4                           | 210/67              | 5            | 20,0                                       | 159,3      | FC 3        | 2,5m S          | 4       | 214/40              | 7                           | 14,3                                       | 76,2       | FC 3  |      |        |       |      |      |      |        |
|                             |                             | 5                           | 025/63              | 7            | 14,3                                       |            |             |                 | 1       | 200/76              | 3                           | 33,3                                       |            |       |      |        |       |      |      |      |        |
|                             |                             | 1                           | 188/ 76 // MF       | 2            | 50                                         |            |             |                 | 2       | 216/58              | 9                           | 9,1                                        |            |       |      |        |       |      |      |      |        |
|                             |                             | 2                           | 312/80 // MF        | 2            | 50                                         |            |             |                 | 3       | 242/36              | 6                           | 16,7                                       |            |       |      |        |       |      |      |      |        |
|                             |                             | 3                           | 088/63              | 4            | 25                                         |            |             |                 | 4       | 340/78 //R          | 14                          | 7,1                                        |            |       |      |        |       |      |      |      |        |
|                             |                             | 4                           | 220/65              | 7            | 14,29                                      |            |             |                 | 5       | 050/55              | 10                          | 10                                         |            |       |      |        |       |      |      |      |        |
|                             |                             | 5                           | 038/70              | 5            | 20                                         |            |             |                 | 1       | 160/21              | 16                          | 6,3                                        |            |       |      |        |       |      |      |      |        |
|                             |                             | 1                           | 184/83              | 11           | 9,1                                        |            |             |                 | 2       | 180/87//MF          | 14                          | 7,1                                        |            |       |      |        |       |      |      |      |        |
|                             |                             | 2                           | 327/81 // MF        | 6            | 16,7                                       |            |             |                 | 3       | 350/50 //R          | 11                          | 9,1                                        |            |       |      |        |       |      |      |      |        |
|                             |                             | 3                           | 077/65              | 13           | 7,7                                        |            |             |                 | 4       | 045/52              | 12                          | 8,3                                        |            |       |      |        |       |      |      |      |        |
|                             |                             | 4                           | 074/68              | 18           | 5,6                                        |            |             |                 | 39,0    | FC 2                | <b>Fault A4 (Limestone)</b> | 9m N                                       |            |       | 5    | 240/42 | 7     | 14,3 | 45,1 | FC 2 |        |
|                             |                             | <b>Fault A6 (Limestone)</b> | 20m S               | 1            | 358/89 //MF                                |            |             |                 | 10      | 10                  |                             |                                            |            |       | 20,3 | FC 2   | 17m N | 1    |      |      | 100/45 |
| 2                           | 248/58                      |                             |                     | 21           | 4,8                                        | 2          | 350/80 //MF | 3               | 33,3    |                     |                             |                                            |            |       |      |        |       |      |      |      |        |
| 3                           | 010/15                      |                             |                     | 18           | 5,6                                        | 3          | 090/20      | 13              | 7,7     |                     |                             |                                            |            |       |      |        |       |      |      |      |        |
| 8m S                        | 1                           |                             | 178/79 //MF         | 3            | 33,3                                       | 81,9       | FC 3        | 25m N           | 1       | 335/49              |                             |                                            | 16         | 6,3   | 34,5 | FC 2   |       |      |      |      |        |
|                             | 2                           |                             | 308/25              | 7            | 14,3                                       |            |             |                 | 2       | 110/60              |                             |                                            | 10         | 10,0  |      |        |       |      |      |      |        |
|                             | 3                           |                             | 240/ 88             | 7            | 14,3                                       |            |             |                 | 3       | 350/76 //R          |                             | 14                                         | 7,1        |       |      |        |       |      |      |      |        |
| 3m S                        | 1                           |                             | 080/70              | 6            | 16,7                                       | 111,1      | FC 3        | 6m S            | 1       | 172/84 //MF         |                             | 3                                          | 33,3       | 224,7 | FC 4 |        |       |      |      |      |        |
|                             | 2                           |                             | 182/88 //MF         | 3            | 33,3                                       |            |             |                 | 2       | 010/35              |                             | 3,0                                        | 33,3       |       |      |        |       |      |      |      |        |
|                             | 3                           |                             | 130/85              | 2            | 50,0                                       |            |             |                 | 3       | 234/55              |                             | 3,6                                        | 28         |       |      |        |       |      |      |      |        |
| 1,5m S                      | 4                           |                             | 301/26              | 9            | 11,1                                       | 205,3      | FC 4        | 2m N            | 4       | 330/50              |                             | 10,0                                       | 10         | 179,3 | FC 4 |        |       |      |      |      |        |
|                             | 1                           |                             | 208/80              | 2,7          | 36,7                                       |            |             |                 | 5       | 022/81              |                             | 1,7                                        | 60         |       |      |        |       |      |      |      |        |
|                             | 2                           |                             | 130/80              | 5,6          | 18,0                                       |            |             |                 | 6       | 258/64              | 1,7                         | 60                                         |            |       |      |        |       |      |      |      |        |
| 10 m N                      | 3                           |                             | 180/85 //MF         | 6,0          | 16,7                                       | 104,2      | FC 3        |                 | 10m N   | 1                   | 324/83//R                   | 5,0                                        | 20         |       |      | 39,2   | FC 2  |      |      |      |        |
|                             | 4                           |                             | 163/85 //R          | 3,6          | 28,0                                       |            |             |                 |         | 2                   | 278/39                      | 6,3                                        | 16         |       |      |        |       |      |      |      |        |
|                             | 5                           |                             | 300/85              | 1,8          | 56,0                                       |            |             |                 |         | 3                   | 041/51                      | 1,5                                        | 66,7       |       |      |        |       |      |      |      |        |
| 20m N                       | 6                           |                             | 090/80              | 2            | 50,0                                       | 13,1       | FC 2        | 10m N           | 4       | 300/86              | 6,0                         | 16,7                                       | 179,3      | FC 4  |      |        |       |      |      |      |        |
|                             | 1                           |                             | 330/40              | 6            | 16,7                                       |            |             |                 | 5       | 148/68              | 5,0                         | 20                                         |            |       |      |        |       |      |      |      |        |
|                             | 2                           |                             | 120/80              | 6            | 16,7                                       |            |             |                 | 6       | 019/62              | 2,5                         | 40                                         |            |       |      |        |       |      |      |      |        |
|                             | 3                           | 340/83 // R                 | 5,7                 | 17,5         | 1                                          |            |             |                 | 060/54  | 10                  | 10                          |                                            |            |       |      |        |       |      |      |      |        |
|                             | 4                           | 010/70 // MF                | 3                   | 33,3         | 2                                          |            |             |                 | 340/74  | 6,0                 | 16,67                       |                                            |            |       |      |        |       |      |      |      |        |
|                             | 5                           | 080/65                      | 5                   | 20,0         | 3                                          |            |             |                 | 250/62  | 8                   | 12,5                        |                                            |            |       |      |        |       |      |      |      |        |

Monte\_Carlo simulation was used to testify whether a significant part of the storage capacity of the Hochschwab limestone karst aquifer resides within pores, fractures and karst features of an interconnected fault-zone network.

The underlying assumption is a fault-zone network between base and top spring of the Kläffer spring system at maximum fill ( $\sim 100$  m) just before the onset of the winter months with no additional recharge during the following cold months since precipitation mostly falls as snow. In order to verify whether a fault-zone network with the parameters resulting from this study on one hand could be assumed representative for the entire watershed, and on the other hand may be able to supply the winter base flow to the above springs or whether significant additional storage volume has to be taken into account. A range of percentages of fault rock and corresponding average porosities was chosen as input. The range of gross-rock volume reflects the uncertainty in the exact size of the watershed.

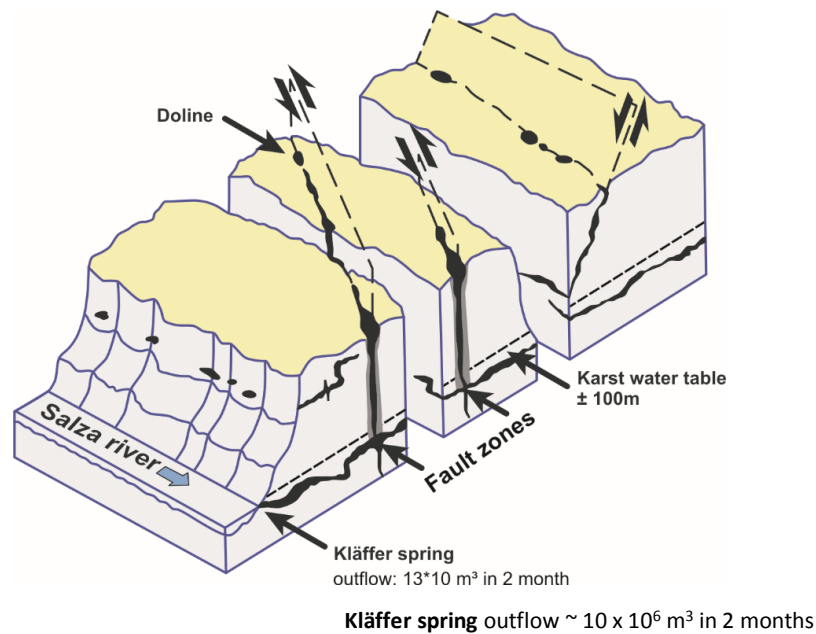

**Fig S2** Block diagram of conceptual karst aquifer system used in Monte Carlo simulation

**Table S1** Input for Monte-Carlo simulation of pore volume of conceptual limestone fault network:

|                                                                  | min        | mode       | max        |
|------------------------------------------------------------------|------------|------------|------------|
| Area of watershed ( $10^6$ m <sup>2</sup> )                      | 54         | 64         | 80         |
| Height (m)                                                       | 80         | 100        | 120        |
| GRV ( $10^6$ m <sup>3</sup> )                                    | 4320       | 6400       | 9600       |
| Net/Gross (decimal)                                              | 0.01       |            | 0.1        |
| Porosity (decimal)                                               | 0.01       | 0.03       | 0.05       |
|                                                                  |            |            |            |
|                                                                  | <b>P90</b> | <b>P50</b> | <b>P10</b> |
| Resulting pore volume of fault network ( $10^6$ m <sup>3</sup> ) | 3.3        | 11         | 20         |

Area: extent of catchment; Height: height of water table above base spring; GRV: total rock volume of phreatic zone; Net/Gross: percentage of fault rock; Porosity: average porosity of fault rock.

P90, P50 and P10 are exceedance probabilities
